# Supplementary material for: DNA-Methylation Signatures of Tobacco Smoking in a High Cardiovascular Risk Population: Modulation by the Mediterranean Diet
Source: MDPI journal article supplement (doi:10.3390/ijerph20043635), 2023-02-18
Supplement: s1 [file s1]

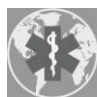

# DNA-methylation signatures of tobacco smoking in a high cardiovascular risk population: modulation by the Mediterranean diet

Rebeca Fernández-Carrión, José V. Sorlí, Eva M Asensio, Eva C Pascual, Olga Portolés, Andrea Alvarez-Sala, Francesc Francès, Judith B Ramírez-Sabio, Alejandro Pérez-Fidalgo, Laura V Villamil, Francisco J Tinahones, Ramon Estruch, Jose M Ordovas, Oscar Coltell and Dolores Corella

## SUPPLEMENTARY MATERIAL

### INDEX

|                                                                                                                                                                                                                                                                                                                                                                             |    |
|-----------------------------------------------------------------------------------------------------------------------------------------------------------------------------------------------------------------------------------------------------------------------------------------------------------------------------------------------------------------------------|----|
| <b>Table S1.</b> Glossary: Gene symbol and name of the annotated genes for the top-ranked CpG sites. ....                                                                                                                                                                                                                                                                   | 2  |
| <b>Table S2.</b> Top differentially methylated CpGs for smoking status (5 levels) <sup>1</sup> ranked by smallest p-value <sup>2</sup> in the multivariable model unadjusted for leukocytes. ....                                                                                                                                                                           | 4  |
| <b>Figure S1. Panel A:</b> Ideogram of the top cg21566642 CpG Methylation site for tobacco smoking; <b>Panel B:</b> Regional plot of EWAS results and co-methylation patterns at the cg21566642 CpG site.....                                                                                                                                                               | 5  |
| <b>Table S3.</b> Top differentially methylated CpGs for smoking status (3 categories) <sup>1</sup> : (A) and for never smokers (N) relative to current smokers (C) <sup>2</sup> ; (B) ranked by smallest p-value after multivariate adjustment <sup>3</sup> (whole list). ....                                                                                              | 7  |
| <b>Table S4.</b> Top differentially methylated CpGs for former smokers (F) relative to current smokers (C) ranked by smallest p-value after multivariate adjustment <sup>1</sup> (whole list).....                                                                                                                                                                          | 9  |
| <b>Table S5.</b> Gene enrichment results for the top-ranked methylation sites in the epigenome-wide methylation analysis for smoking status (5 levels) <sup>1</sup> carried out using the gene ontology (GO) platform. The GO function, type, enrichment score, enrichment p-value and the Bonferroni corrected p-value are presented ranked by the smallest p-values. .... | 10 |
| <b>Table S6.</b> Associations between the top-ranked CpG sites obtained in the epigenome-wide methylation analysis for smoking (5 levels) and the number of cigarettes smoked per day (A), or the number of pack-years (B) in smokers (n=48).....                                                                                                                           | 11 |
| <b>Figure S2.</b> Receiver operating characteristic (ROC) curves of the five top-ranked CpG Methylation sites for tobacco smoking (Table 2) for discriminating current smokers and never smokers. Area under the curve (AUC), 95 % confidence intervals (CI) and the corresponding p-values are presented. ....                                                             | 12 |
| <b>Table S7.</b> Association between tobacco smoking (5 levels) and DNA methylation in cg sites located in chromosome X in women <sup>1</sup> . ....                                                                                                                                                                                                                        | 13 |
| <b>Table S8.</b> Association between tobacco smoking (5 levels) and DNA methylation in cg sites located in chromosomes X and Y in men <sup>1</sup> . ....                                                                                                                                                                                                                   | 14 |
| <b>Figure S3.</b> Interactions between Mediterranean diet (analyzed as low and high adherence) and smoking status in determining DNA-methylation in selected CpG sites: (A) cg21566642; (B) cg05575921; (C) cg09936388; and (D) cg01901332. P-values for the interaction terms were adjusted for sex, age, body mass index, diabetes, batch effect and leukocytes. ....     | 15 |

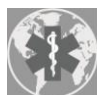

**Table S1.** Glossary: Gene symbol and name of the annotated genes for the top-ranked CpG sites.

| Gene symbol  | Gene name                                                             |
|--------------|-----------------------------------------------------------------------|
| ADCY9        | adenylate cyclase 9                                                   |
| AHRR         | aryl-hydrocarbon receptor repressor                                   |
| ANAPC16      | anaphase promoting complex subunit 16                                 |
| ANPEP        | alanyl aminopeptidase, membrane                                       |
| ARHGDI3      | Rho GDP dissociation inhibitor (GDI) gamma                            |
| ARRB1        | arrestin, beta 1                                                      |
| ATP9A        | ATPase phospholipid transporting 9A (putative)                        |
| C5orf62      | Small integral membrane protein 3 (SMIM3)                             |
| C6orf52      | chromosome 6 open reading frame 52                                    |
| DNAJC15      | DnaJ (Hsp40) homolog, subfamily C, member 15                          |
| DOK1         | docking protein 1                                                     |
| EDEM3        | ER degradation-enhancing alpha-mannosidase-like protein 3             |
| EFTUD2       | elongation factor Tu GTP binding domain containing 2]                 |
| ETV6         | ETS variant transcription factor 6                                    |
| F2RL3        | F2R like thrombin or trypsin receptor 3                               |
| G3BP1        | G3BP stress granule assembly factor 1                                 |
| GAB2         | GRB2 associated binding protein 2                                     |
| GFI1         | growth factor independent 1 transcriptional repressor                 |
| GNG12        | G protein subunit gamma 12                                            |
| GPR15        | G protein-coupled receptor 15                                         |
| ITPK1        | Inositol 1,3,4-trisphosphate 5/6-kinase family protein                |
| KBTBD3       | kelch repeat and BTB domain containing 3                              |
| KCNQ1OT1     | KCNQ1 opposite strand/antisense transcript 1                          |
| KDSR         | 3-ketodihydrosphingosine reductase                                    |
| KIF26B       | kinesin family member 26B                                             |
| LAT          | linker for activation of T cells                                      |
| LINS1        | lines homolog 1                                                       |
| LMO2         | LIM domain only 2                                                     |
| LOC101060019 | long intergenic non-protein coding RNA 1799                           |
| LOC400043    | long intergenic non-protein coding RNA 2381 (LINC02381)               |
| LRP5         | LDL receptor related protein 5                                        |
| LRRN3        | leucine rich repeat neuronal 3                                        |
| MAP7D1       | MAP7 domain containing 1                                              |
| MGAT3        | beta-1,4-mannosyl-glycoprotein 4-beta-N-acetylglucosaminyltransferase |
| MTSS1        | MTSS I-BAR domain containing 1                                        |
| MYH6         | myosin heavy chain 6                                                  |
| NKX6-2       | NK6 homeobox 2                                                        |
| NRIP1        | nuclear receptor interacting protein 1                                |
| NUDT4        | nudix hydrolase homolog 4                                             |
| NUDT4P2      | nudix hydrolase 4 pseudogene 2                                        |
| PLCB3        | phospholipase C beta 3                                                |
| PRSS23       | serine protease 23                                                    |
| RAB6A        | Ras-related small GTP-binding family protein                          |
| RARA         | retinoic acid receptor alpha                                          |
| SCAF1        | SR-related CTD-associated factor 1                                    |



---

|           |                                               |
|-----------|-----------------------------------------------|
| SEMA7A    | semaphorin 7A (John Milton Hagen blood group) |
| SPATA17   | spermatogenesis-associated protein 17         |
| SRP14-AS1 | SRP14 divergent transcript]                   |
| TIGD7     | tigger transposable element derived 7         |
| TMEM97    | transmembrane protein 97                      |
| UXS1      | UDP-glucuronic acid decarboxylase 1           |
| XYLT1     | xylosyltransferase 1                          |

---

**Table S2.** Top differentially methylated CpGs for smoking status (5 levels)<sup>1</sup> ranked by smallest p-value<sup>2</sup> in the multivariable model unadjusted for leukocytes.

| CpG site   | Gene<br>Symbol | Chr | CpG_Island | <i>p</i> | <i>r</i> |
|------------|----------------|-----|------------|----------|----------|
| cg21566642 | intergenic     | 2   | Island     | 1.68E-34 | -0.5613  |
| cg01940273 | intergenic     | 2   | Island     | 4.92E-20 | -0.4370  |
| cg14391737 | PRSS23         | 11  | S_Shore    | 3.37E-19 | -0.4280  |
| cg17739917 | RARA           | 17  | S_Shelf    | 1.19E-18 | -0.4219  |
| cg21911711 | F2RL3          | 19  | N_Shore    | 1.98E-16 | -0.3960  |
| cg24859433 | intergenic     | 6   |            | 3.31E-15 | -0.3807  |
| cg17287155 | AHRR           | 5   |            | 3.68E-15 | -0.3801  |
| cg18110140 | intergenic     | 15  |            | 1.84E-14 | -0.3709  |
| cg19572487 | RARA           | 17  | S_Shore    | 2.33E-14 | -0.3696  |
| cg00475490 | PRSS23         | 11  |            | 3.14E-14 | -0.3678  |
| cg05575921 | AHRR           | 5   | N_Shore    | 1.15E-13 | -0.3602  |
| cg09935388 | GFI1           | 1   | Island     | 1.28E-13 | -0.3595  |
| cg15342087 | intergenic     | 6   |            | 8.96E-13 | -0.3476  |
| cg04551776 | AHRR           | 5   |            | 4.71E-12 | -0.3370  |
| cg25189904 | GNG12          | 1   | S_Shore    | 6.01E-12 | -0.3354  |
| cg25648203 | AHRR           | 5   |            | 8.30E-12 | -0.3333  |
| cg03636183 | F2RL3          | 19  | N_Shore    | 1.07E-11 | -0.3316  |
| cg16841366 | intergenic     | 2   | S_Shore    | 1.69E-11 | -0.3286  |
| cg19859270 | GPR15          | 3   |            | 2.97E-11 | -0.3248  |
| cg01901332 | ARRB1          | 11  |            | 5.59E-11 | -0.3204  |
| cg26703534 | AHRR           | 5   | S_Shelf    | 5.61E-11 | -0.3204  |
| cg27241845 | intergenic     | 2   | N_Shore    | 5.77E-11 | -0.3202  |
| cg02978227 | intergenic     | 3   |            | 7.12E-11 | -0.3188  |
| cg12806681 | AHRR           | 5   | N_Shore    | 6.72E-10 | -0.3027  |

<sup>1</sup> Five levels of smoking status were considered as an ordinal variable: Never smoker, former smoker, smoker > 5 years, former smoker 1 to 5 years, former smoker < 1 year, and current smoker.

<sup>2</sup> Models were adjusted for sex, age, diabetes, body mass index, and batch effect (n=414).

Chr: chromosome; p: Multivariate adjusted p-values; r: partial correlation coefficient.

**Figure S1. Panel A:** Ideogram of the top cg21566642 CpG Methylation site for tobacco smoking;  
**Panel B:** Regional plot of EWAS results and co-methylation patterns at the cg21566642 CpG site.

### Panel A

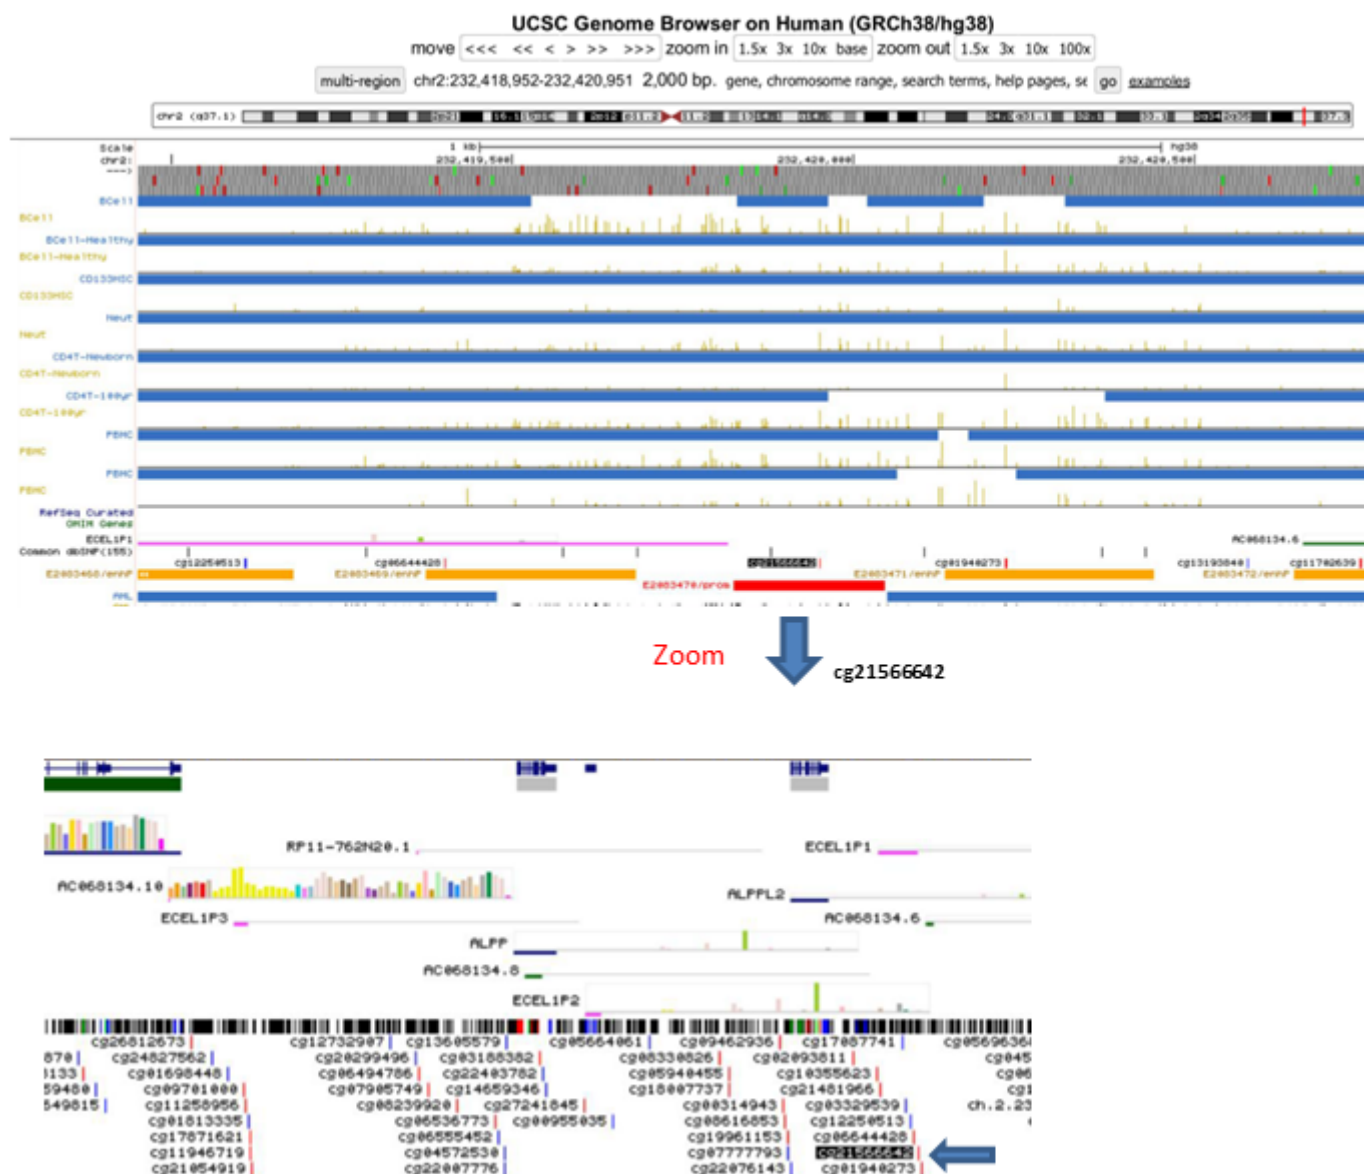

## Panel B

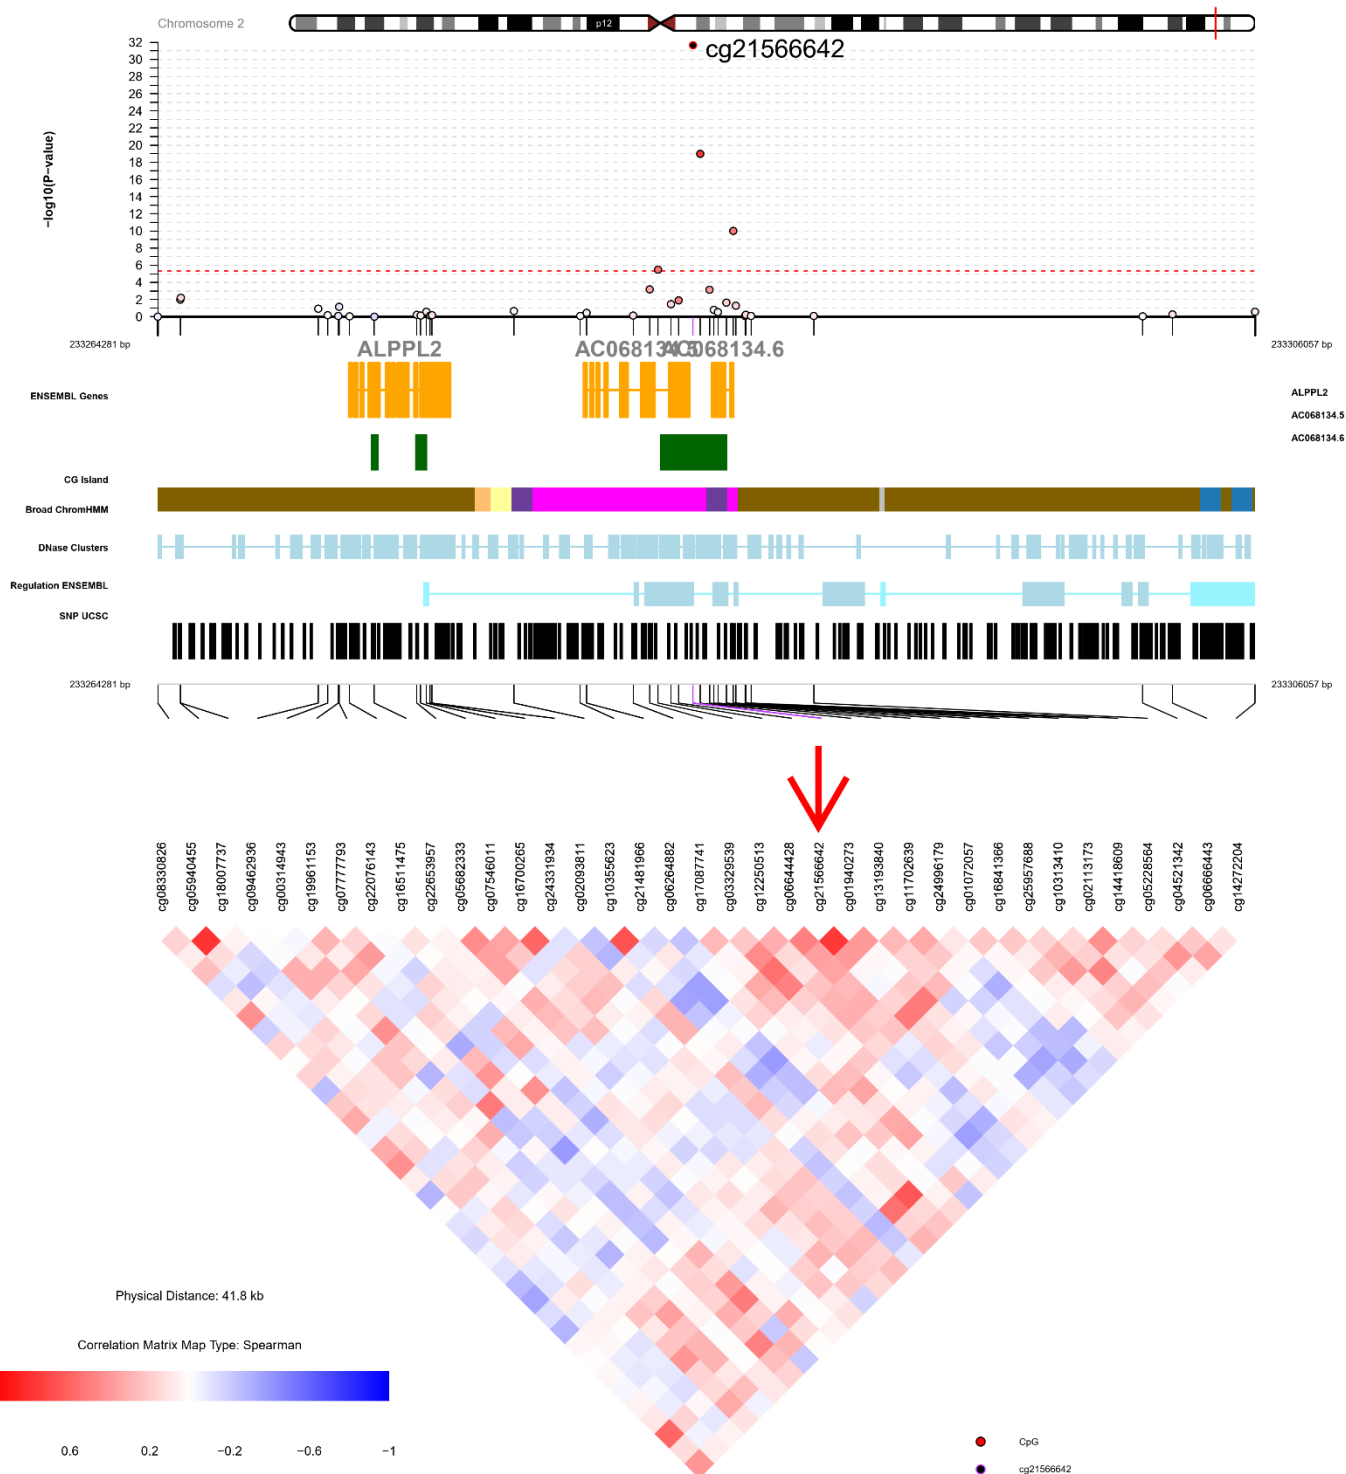

This plot has been depicted using the coMET package: <http://comet.epigen.kcl.ac.uk:3838/coMET/>.

**Table S3.** Top differentially methylated CpGs for smoking status (3 categories)<sup>1</sup>: (A) and for never smokers (N) relative to current smokers (C)<sup>2</sup>; (B) ranked by smallest p-value after multivariate adjustment<sup>3</sup> (whole list).

| A-Smoking (3 categories) |              |     |                         | B-Never (N) versus current smokers (C) |             |     |                    |                              |
|--------------------------|--------------|-----|-------------------------|----------------------------------------|-------------|-----|--------------------|------------------------------|
| CpG site                 | Gene Symbol  | Chr | $p^4$<br>(3 categories) | CpG site                               | Gene Symbol | Chr | $p^5$<br>(N vs. C) | Beta Difference <sup>6</sup> |
| cg21566642               |              | 2   | 1.39E-29                | cg21566642                             |             | 2   | 1.68E-30           | 0.143                        |
| cg14391737               | PRSS23       | 11  | 6.95E-20                | cg01940273                             |             | 2   | 1.30E-20           | 0.097                        |
| cg01940273               |              | 2   | 1.44E-19                | cg14391737                             | PRSS23      | 11  | 1.71E-17           | 0.107                        |
| cg17739917               | RARA         | 17  | 3.44E-16                | cg17739917                             | RARA        | 17  | 5.13E-17           | 0.112                        |
| cg21911711               | F2RL3        | 19  | 8.14E-16                | cg21911711                             | F2RL3       | 19  | 8.76E-17           | 0.085                        |
| cg00475490               | PRSS23       | 11  | 9.66E-16                | cg00475490                             | PRSS23      | 11  | 1.73E-15           | 0.046                        |
| cg24859433               |              | 6   | 1.96E-14                | cg24859433                             |             | 6   | 2.29E-15           | 0.048                        |
| cg18110140               |              | 15  | 2.36E-13                | cg18110140                             |             | 15  | 3.04E-14           | 0.094                        |
| cg09935388               | GFI1         | 1   | 5.94E-13                | cg09935388                             | GFI1        | 1   | 6.54E-14           | 0.105                        |
| cg25648203               | AHRR         | 5   | 9.21E-13                | cg19572487                             | RARA        | 17  | 1.78E-13           | 0.073                        |
| cg25189904               | GNG12        | 1   | 1.46E-12                | cg25189904                             | GNG12       | 1   | 1.90E-13           | 0.110                        |
| cg19572487               | RARA         | 17  | 1.55E-12                | cg25648203                             | AHRR        | 5   | 5.67E-13           | 0.065                        |
| cg26703534               | AHRR         | 5   | 2.44E-11                | cg01901332                             | ARRB1       | 11  | 3.61E-12           | 0.078                        |
| cg01901332               | ARRB1        | 11  | 2.63E-11                | cg03636183                             | F2RL3       | 19  | 4.54E-12           | 0.132                        |
| cg03636183               | F2RL3        | 19  | 3.84E-11                | cg17287155                             | AHRR        | 5   | 7.31E-12           | 0.029                        |
| cg17287155               | AHRR         | 5   | 5.62E-11                | cg04551776                             | AHRR        | 5   | 1.89E-11           | 0.055                        |
| cg04551776               | AHRR         | 5   | 1.01E-10                | cg15342087                             |             | 6   | 1.89E-11           | 0.039                        |
| cg15342087               |              | 6   | 1.38E-10                | cg26703534                             | AHRR        | 5   | 2.87E-11           | 0.056                        |
| cg05086879               | MGAT3        | 22  | 1.59E-10                | cg05575921                             | AHRR        | 5   | 3.59E-11           | 0.211                        |
| cg05575921               | AHRR         | 5   | 2.02E-10                | cg11660018                             | PRSS23      | 11  | 3.66E-11           | 0.068                        |
| cg23161492               | ANPEP        | 15  | 2.27E-10                | cg23161492                             | ANPEP       | 15  | 8.52E-11           | 0.072                        |
| cg11660018               | PRSS23       | 11  | 2.96E-10                | cg14580211                             | C5orf62     | 5   | 3.47E-10           | 0.070                        |
| cg05284742               | ITPK1        | 14  | 1.11E-09                | cg05284742                             | ITPK1       | 14  | 3.62E-10           | 0.052                        |
| cg11556164               | LRRN3        | 7   | 1.13E-09                | cg05086879                             | MGAT3       | 22  | 5.47E-10           | 0.048                        |
| cg14580211               | C5orf62      | 5   | 2.72E-09                | cg16841366                             |             | 2   | 1.11E-09           | 0.087                        |
| cg16841366               |              | 2   | 5.28E-09                | cg11556164                             | LRRN3       | 7   | 2.00E-09           | 0.037                        |
| cg19859270               | GPR15        | 3   | 5.33E-09                | cg18146737                             | GFI1        | 1   | 2.07E-09           | 0.070                        |
| cg18146737               | GFI1         | 1   | 1.41E-08                | cg19859270                             | GPR15       | 3   | 2.68E-09           | 0.023                        |
| cg04535902               | GFI1         | 1   | 1.52E-08                | cg04535902                             | GFI1        | 1   | 2.83E-09           | 0.054                        |
| cg17738628               |              | 15  | 3.73E-08                | cg16794579                             | XYLT1       | 16  | 1.12E-08           | 0.053                        |
| cg21611682               | LRP5         | 11  | 3.89E-08                | cg27241845                             |             | 2   | 1.14E-08           | 0.076                        |
| cg16794579               | XYLT1        | 16  | 6.77E-08                | cg17738628                             |             | 15  | 2.27E-08           | 0.040                        |
| cg12806681               | AHRR         | 5   | 7.01E-08                | cg07986378                             | ETV6        | 12  | 2.62E-08           | 0.068                        |
| cg27241845               |              | 2   | 7.85E-08                | cg12876356                             | GFI1        | 1   | 2.80E-08           | 0.077                        |
| cg07898952               | LMO2         | 11  | 8.02E-08                | cg00310412                             | SEMA7A      | 15  | 2.96E-08           | 0.045                        |
| cg26673040               | LOC101060019 | 2   | 8.47E-08                | cg02978227                             |             | 3   | 3.04E-08           | 0.020                        |
| cg07986378               | ETV6         | 12  | 1.14E-07                | cg06321596                             | XYLT1       | 16  | 4.47E-08           | 0.065                        |
| cg21828716               | MYH6         | 14  | 1.26E-07                | cg21828716                             | MYH6        | 14  | 4.86E-08           | 0.125                        |
| cg00039048               | NRIP1        | 21  | 1.66E-07                | cg07339236                             | ATP9A       | 20  | 5.11E-08           | 0.035                        |
| cg02978227               |              | 3   | 1.94E-07                | cg18158149                             | NOS1AP      | 1   | 5.49E-08           | 0.071                        |
| cg12093781               | KIF26B       | 1   | 1.97E-07                | cg12806681                             | AHRR        | 5   | 5.60E-08           | 0.029                        |
| cg12876356               | GFI1         | 1   | 1.97E-07                | cg21611682                             | LRP5        | 11  | 6.06E-08           | 0.045                        |
| cg15394081               | LMO2         | 11  | 2.05E-07                | cg19701538                             | XYLT1       | 16  | 8.65E-08           | 0.073                        |
| cg00310412               | SEMA7A       | 15  | 2.07E-07                | cg08714510                             | UXS1        | 2   | 9.20E-08           | 0.040                        |

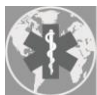

<sup>1</sup> Three categories for tobacco smoking were considered: Never smoker, former smoker, and current smoker (n=414).

<sup>2</sup> Never smokers (n=188) were compared to current smokers (n=48).

<sup>3</sup> Models were adjusted for sex, age, diabetes, body mass index, batch effect and leukocyte cell-types.

<sup>4</sup> p-value for the categorical variable (3 categories). Multivariate adjusted p-values.

<sup>5</sup> p-value for the comparisons between Never and Current smokers. Multivariate adjusted p-values.

<sup>6</sup> Beta difference for methylation comparing never versus current smokers.

Chr: chromosome; N vs. C: comparisons between Never (N) and Current (C) smokers.





**Table S4.** Top differentially methylated CpGs for former smokers (F) relative to current smokers (C) ranked by smallest p-value after multivariate adjustment<sup>1</sup> (whole list).

| CpG site   | Gene Symbol  | Chr | $p^2$<br>(F vs. C) | Beta<br>Difference <sup>3</sup> |
|------------|--------------|-----|--------------------|---------------------------------|
| cg21566642 |              | 2   | 2.51E-16           | 0.0935                          |
| cg01940273 |              | 2   | 8.57E-13           | 0.0706                          |
| cg25648203 | AHRR         | 5   | 2.39E-11           | 0.0563                          |
| cg26703534 | AHRR         | 5   | 1.20E-10           | 0.0516                          |
| cg05086879 | MGAT3        | 22  | 1.82E-10           | 0.0452                          |
| cg18110140 |              | 15  | 7.19E-10           | 0.0719                          |
| cg21911711 | F2RL3        | 19  | 1.49E-09           | 0.0588                          |
| cg11556164 | LRRN3        | 7   | 1.66E-09           | 0.0355                          |
| cg25189904 | GNG12        | 1   | 2.65E-09           | 0.0824                          |
| cg23161492 | ANPEP        | 15  | 3.85E-09           | 0.0631                          |
| cg17739917 | RARA         | 17  | 8.78E-09           | 0.0714                          |
| cg04551776 | AHRR         | 5   | 1.21E-08           | 0.0440                          |
| cg24859433 |              | 6   | 1.38E-08           | 0.0332                          |
| cg01901332 | ARRB1        | 11  | 1.67E-08           | 0.0607                          |
| cg05284742 | ITPK1        | 14  | 1.71E-08           | 0.0437                          |
| cg05575921 | AHRR         | 5   | 2.35E-08           | 0.1707                          |
| cg09935388 | GFI1         | 1   | 2.69E-08           | 0.0762                          |
| cg12093781 | KIF26B       | 1   | 2.81E-08           | 0.0790                          |
| cg21611682 | LRP5         | 11  | 3.43E-08           | 0.0433                          |
| cg17287155 | AHRR         | 5   | 4.30E-08           | 0.0225                          |
| cg07898952 | LMO2         | 11  | 4.68E-08           | 0.0492                          |
| cg26673040 | LOC101060019 | 2   | 5.87E-08           | 0.0280                          |
| cg19572487 | RARA         | 17  | 7.13E-08           | 0.0500                          |
| cg00039048 | NRIP1        | 21  | 8.26E-08           | 0.0386                          |
| cg03636183 | F2RL3        | 19  | 9.16E-08           | 0.0948                          |
| cg17738628 |              | 15  | 9.27E-08           | 0.0389                          |
| cg25094529 | SRP14-AS1    | 15  | 9.71E-08           | 0.0432                          |

<sup>1</sup> Models were adjusted for sex, age, diabetes, body mass index, batch effect and leukocyte cell-types.

<sup>2</sup> p-value for the comparisons between former (n=178) and current smokers (n=48). Multivariate adjusted p-values.

<sup>3</sup> Beta difference for methylation comparing former versus current smokers.

Chr: chromosome; F vs. C: comparisons between former (F) and current (C) smokers.

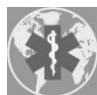

**Table S5.** Gene enrichment results for the top-ranked methylation sites in the epigenome-wide methylation analysis for smoking status (5 levels)<sup>1</sup> carried out using the gene ontology (GO) platform. The GO function, type, enrichment score, enrichment p-value and the Bonferroni corrected p-value are presented ranked by the smallest p-values.

| Function                                                        | type               | Enrichment<br>Score | Enrichment<br><i>p</i> | Bonferroni<br>(Enrichment <i>p</i> ) |
|-----------------------------------------------------------------|--------------------|---------------------|------------------------|--------------------------------------|
| negative regulation of tau-protein kinase activity              | biological process | 123.12              | 3.40E-54               | 1.09E-50                             |
| positive regulation of interleukin-13 production                | biological process | 103.66              | 9.57E-46               | 3.08E-42                             |
| positive regulation of interleukin-5 production                 | biological process | 82.26               | 1.89E-36               | 6.07E-33                             |
| perinucleolar compartment                                       | cellular component | 74.01               | 7.19E-33               | 2.32E-29                             |
| regulation of interleukin-13 production                         | biological process | 68.58               | 1.65E-30               | 5.32E-27                             |
| inositol trisphosphate metabolic process                        | biological process | 61.71               | 1.58E-27               | 5.10E-24                             |
| regulation of inorganic anion transmembrane transport           | biological process | 61.71               | 1.58E-27               | 5.10E-24                             |
| positive regulation of macrophage differentiation               | biological process | 54.58               | 1.97E-24               | 6.34E-21                             |
| regulation of endocytic recycling                               | biological process | 48.06               | 1.34E-21               | 4.33E-18                             |
| negative regulation of granulocyte differentiation              | biological process | 46.30               | 7.78E-21               | 2.50E-17                             |
| regulation of protein localization to early endosome            | biological process | 46.30               | 7.78E-21               | 2.50E-17                             |
| positive regulation of protein localization to early endosome   | biological process | 46.30               | 7.78E-21               | 2.50E-17                             |
| positive regulation of histone H3-K9 acetylation                | biological process | 46.30               | 7.78E-21               | 2.50E-17                             |
| regulation of cAMP-dependent protein kinase activity            | biological process | 42.90               | 2.33E-19               | 7.51E-16                             |
| cAMP-dependent protein kinase inhibitor activity                | molecular function | 41.16               | 1.34E-18               | 4.30E-15                             |
| regulation of anion channel activity                            | biological process | 41.16               | 1.34E-18               | 4.30E-15                             |
| regulation of interleukin-5 production                          | biological process | 40.71               | 2.09E-18               | 6.74E-15                             |
| negative regulation of cAMP-dependent protein kinase activity   | biological process | 37.03               | 8.25E-17               | 2.65E-13                             |
| regulation of macrophage differentiation                        | biological process | 36.92               | 9.28E-17               | 2.99E-13                             |
| negative regulation of protein serine/threonine kinase activity | biological process | 35.90               | 2.56E-16               | 8.25E-13                             |
| positive regulation of protein localization to endosome         | biological process | 33.66               | 2.42E-15               | 7.78E-12                             |
| cAMP-dependent protein kinase regulator activity                | molecular function | 33.66               | 2.42E-15               | 7.78E-12                             |

<sup>1</sup>: Five levels of smoking status were considered as an ordinal variable: Never smoker, former smoker, smoker > 5 years, former smoker 1 to 5 years, former smoker < 1 year, and current smoker.



**Table S6.** Associations between the top-ranked CpG sites obtained in the epigenome-wide methylation analysis for smoking (5 levels) and the number of cigarettes smoked per day (A), or the number of pack-years (B) in smokers (n=48).

| CpG        | Gene<br>Symbol | A-Number of<br>cigarettes per day |          | B-Number of pack-<br>years |          |
|------------|----------------|-----------------------------------|----------|----------------------------|----------|
|            |                | <i>r</i>                          | <i>p</i> | <i>r</i>                   | <i>p</i> |
| cg21566642 | intergenic     | -0.523                            | 0.0001   | -0.516                     | 0.0002   |
| cg01940273 | intergenic     | -0.418                            | 0.0031   | -0.410                     | 0.0038   |
| cg14391737 | PRSS23         | -0.368                            | 0.0100   | -0.531                     | 0.0001   |
| cg17739917 | RARA           | -0.247                            | 0.0908   | -0.344                     | 0.0168   |
| cg21911711 | F2RL3          | -0.176                            | 0.2308   | -0.414                     | 0.0035   |
| cg18110140 | intergenic     | -0.374                            | 0.0089   | -0.450                     | 0.0013   |
| cg19572487 | RARA           | -0.320                            | 0.0265   | -0.332                     | 0.0213   |
| cg24859433 | intergenic     | -0.328                            | 0.0230   | -0.533                     | 0.0001   |
| cg17287155 | AHRR           | -0.241                            | 0.0992   | -0.104                     | 0.4816   |
| cg00475490 | PRSS23         | -0.269                            | 0.0644   | -0.367                     | 0.0102   |
| cg09935388 | GFI1           | -0.196                            | 0.1821   | -0.308                     | 0.0334   |
| cg05575921 | AHRR           | -0.402                            | 0.0046   | -0.509                     | 0.0002   |
| cg15342087 | intergenic     | -0.382                            | 0.0073   | -0.523                     | 0.0001   |
| cg04551776 | AHRR           | -0.359                            | 0.0122   | -0.212                     | 0.1486   |
| cg25189904 | GNG12          | -0.222                            | 0.1299   | -0.352                     | 0.0141   |
| cg03636183 | F2RL3          | -0.243                            | 0.0967   | -0.408                     | 0.0040   |
| cg26703534 | AHRR           | -0.229                            | 0.1175   | -0.359                     | 0.0121   |
| cg25648203 | AHRR           | -0.365                            | 0.0108   | -0.372                     | 0.0092   |
| cg01901332 | ARRB1          | -0.067                            | 0.6503   | -0.333                     | 0.0207   |
| cg27241845 | intergenic     | -0.238                            | 0.1027   | -0.483                     | 0.0005   |
| cg19859270 | GPR15          | -0.305                            | 0.0351   | -0.498                     | 0.0003   |
| cg16841366 | intergenic     | -0.266                            | 0.0676   | -0.401                     | 0.0047   |
| cg23161492 | ANPEP          | -0.100                            | 0.5010   | -0.196                     | 0.1817   |
| cg02978227 | intergenic     | -0.210                            | 0.1519   | -0.343                     | 0.0171   |
| cg11660018 | PRSS23         | -0.233                            | 0.1108   | -0.295                     | 0.0418   |
| cg14580211 | C5orf62        | -0.196                            | 0.1822   | -0.349                     | 0.0150   |
| cg11556164 | LRRN3          | -0.104                            | 0.4817   | -0.187                     | 0.2019   |
| cg12806681 | AHRR           | -0.051                            | 0.7296   | -0.168                     | 0.2534   |
| cg05086879 | MGAT3          | -0.355                            | 0.0133   | -0.316                     | 0.0288   |
| cg05284742 | ITPK1          | -0.239                            | 0.1013   | -0.361                     | 0.0117   |
| cg17738628 | intergenic     | -0.061                            | 0.6808   | -0.262                     | 0.0718   |
| cg21611682 | LRP5           | -0.173                            | 0.2395   | -0.324                     | 0.0247   |
| cg07339236 | ATP9A          | -0.033                            | 0.8219   | 0.012                      | 0.9378   |
| cg24838345 | MTSS1          | -0.082                            | 0.5798   | -0.118                     | 0.4260   |
| cg19554457 | NUDT4          | -0.147                            | 0.3177   | -0.210                     | 0.1523   |

r: Spearman rho; p: p-values.

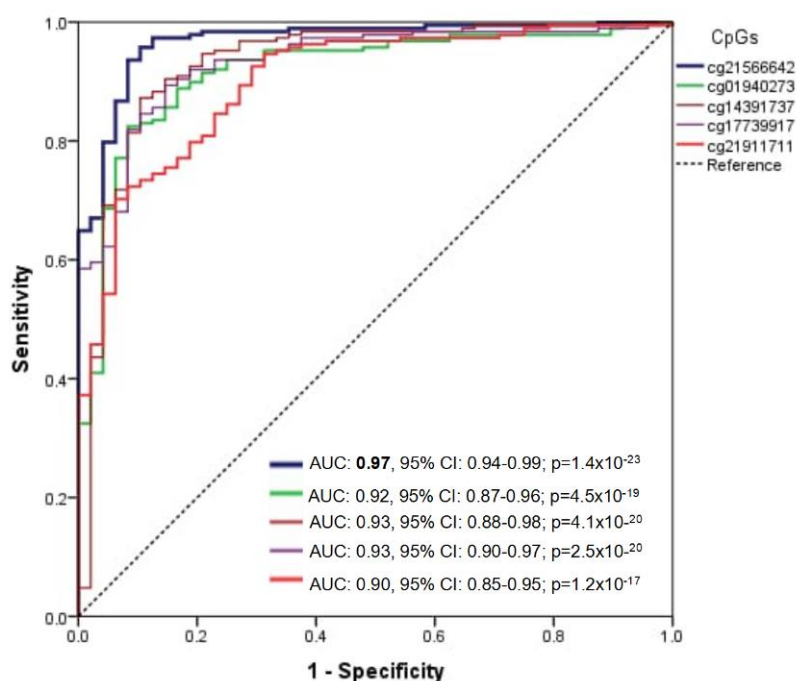

**Figure S2.** Receiver operating characteristic (ROC) curves of the five top-ranked CpG Methylation sites for tobacco smoking (Table 2) for discriminating current smokers and never smokers. Area under the curve (AUC), 95 % confidence intervals (CI) and the corresponding p-values are presented.

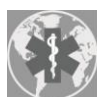

**Table S7.** Association between tobacco smoking (5 levels) and DNA methylation in cg sites located in chromosome X in women<sup>1</sup>.

| CpG site   | Gene<br>Symbol    | Chr | $p^2$    | $r^3$   |
|------------|-------------------|-----|----------|---------|
| cg25433595 | XKRX              | X   | 1.96E-05 | -0.2893 |
| cg13915481 | RAI2              | X   | 2.43E-04 | -0.2501 |
| cg08661309 | <i>intergenic</i> | X   | 2.76E-04 | -0.2479 |
| cg12496847 | UPRT              | X   | 3.00E-04 | -0.2465 |
| cg07187289 | IDH3G             | X   | 3.45E-04 | -0.2441 |
| cg24795667 | PDHA1             | X   | 3.58E-04 | -0.2435 |
| cg07861170 | <i>intergenic</i> | X   | 4.38E-04 | -0.2399 |
| cg11887001 | <i>intergenic</i> | X   | 4.49E-04 | -0.2395 |
| cg08626646 | <i>intergenic</i> | X   | 4.66E-04 | -0.2388 |
| cg18225658 | PDZD4             | X   | 5.11E-04 | -0.2372 |
| cg13113011 | COL4A5            | X   | 6.65E-04 | -0.2325 |
| cg00920537 | PHF6              | X   | 7.52E-04 | -0.2302 |
| cg10860270 | ZCCHC5            | X   | 8.11E-04 | -0.2289 |
| cg06398113 | WWC3              | X   | 8.24E-04 | -0.2286 |
| cg25614853 | <i>intergenic</i> | X   | 1.04E-03 | -0.2243 |
| cg16561205 | WWC3              | X   | 1.06E-03 | -0.2238 |
| cg11434282 | KDM6A             | X   | 1.09E-03 | -0.2234 |
| cg08869785 | TENM1             | X   | 1.09E-03 | -0.2233 |
| cg16488059 | LANCL3            | X   | 1.10E-03 | -0.2231 |
| cg23192918 | MIR505            | X   | 1.10E-03 | -0.2231 |
| cg21598868 | ACE2              | X   | 1.26E-03 | -0.2206 |

<sup>1</sup>Models were adjusted for age, diabetes, body mass index, batch effect and leukocyte cell-types.

<sup>2</sup>p-value for the continuous variable (5 levels) in women. Multivariable adjusted p-values.

<sup>3</sup>Partial correlation (r) for the continuous variable (5 levels) in women.

Chr: chromosome.



**Table S8.** Association between tobacco smoking (5 levels) and DNA methylation in cg sites located in chromosomes X and Y in men<sup>1</sup>.

| CpG site   | Gene       |     | $p^2$    | $r^3$   |
|------------|------------|-----|----------|---------|
|            | Symbol     | Chr |          |         |
| cg25270201 | WWC3       | X   | 9.80E-06 | -0.3328 |
| cg25558667 | WWC3       | X   | 1.09E-05 | -0.3312 |
| cg06398113 | WWC3       | X   | 5.27E-05 | -0.3058 |
| cg21956484 | XPNPEP2    | X   | 5.50E-05 | 0.3051  |
| cg21207958 | SOX3       | X   | 4.17E-04 | -0.2685 |
| cg16561205 | WWC3       | X   | 4.21E-04 | -0.2683 |
| cg18791672 | FAM47A     | X   | 5.77E-04 | 0.2621  |
| cg26739410 | FAM47C     | X   | 5.82E-04 | 0.2619  |
| cg14095687 | PNMA3      | X   | 5.94E-04 | -0.2615 |
| cg00901375 | FAM70A     | X   | 6.11E-04 | -0.2610 |
| cg09287749 | WWC3       | X   | 6.52E-04 | -0.2596 |
| cg09619693 | intergenic | X   | 8.11E-04 | -0.2552 |
| cg00379799 | intergenic | X   | 8.52E-04 | 0.2542  |
| cg16116006 | DMD        | X   | 8.73E-04 | 0.2537  |
| cg02035173 | MAGEA4     | X   | 9.03E-04 | 0.2530  |
| cg07476668 | intergenic | X   | 9.36E-04 | 0.2523  |
| cg06122016 | RBM10      | X   | 1.10E-03 | 0.2490  |
| cg01831199 | RBM41      | X   | 1.20E-03 | -0.2471 |
| cg21912308 | PRAF2      | X   | 1.42E-03 | -0.2435 |
| cg00213853 | MPP1       | X   | 1.57E-03 | -0.2414 |
| cg23623863 | HTR2C      | X   | 1.63E-03 | 0.2406  |

<sup>1</sup>Models were adjusted for age, diabetes, body mass index, batch effect and leukocyte cell-types.

<sup>2</sup>p-value for the continuous variable (5 levels) in men. Multivariable adjusted p-values.

<sup>3</sup>Partial correlation (r) for the continuous variable (5 levels) in men.

Chr: chromosome.

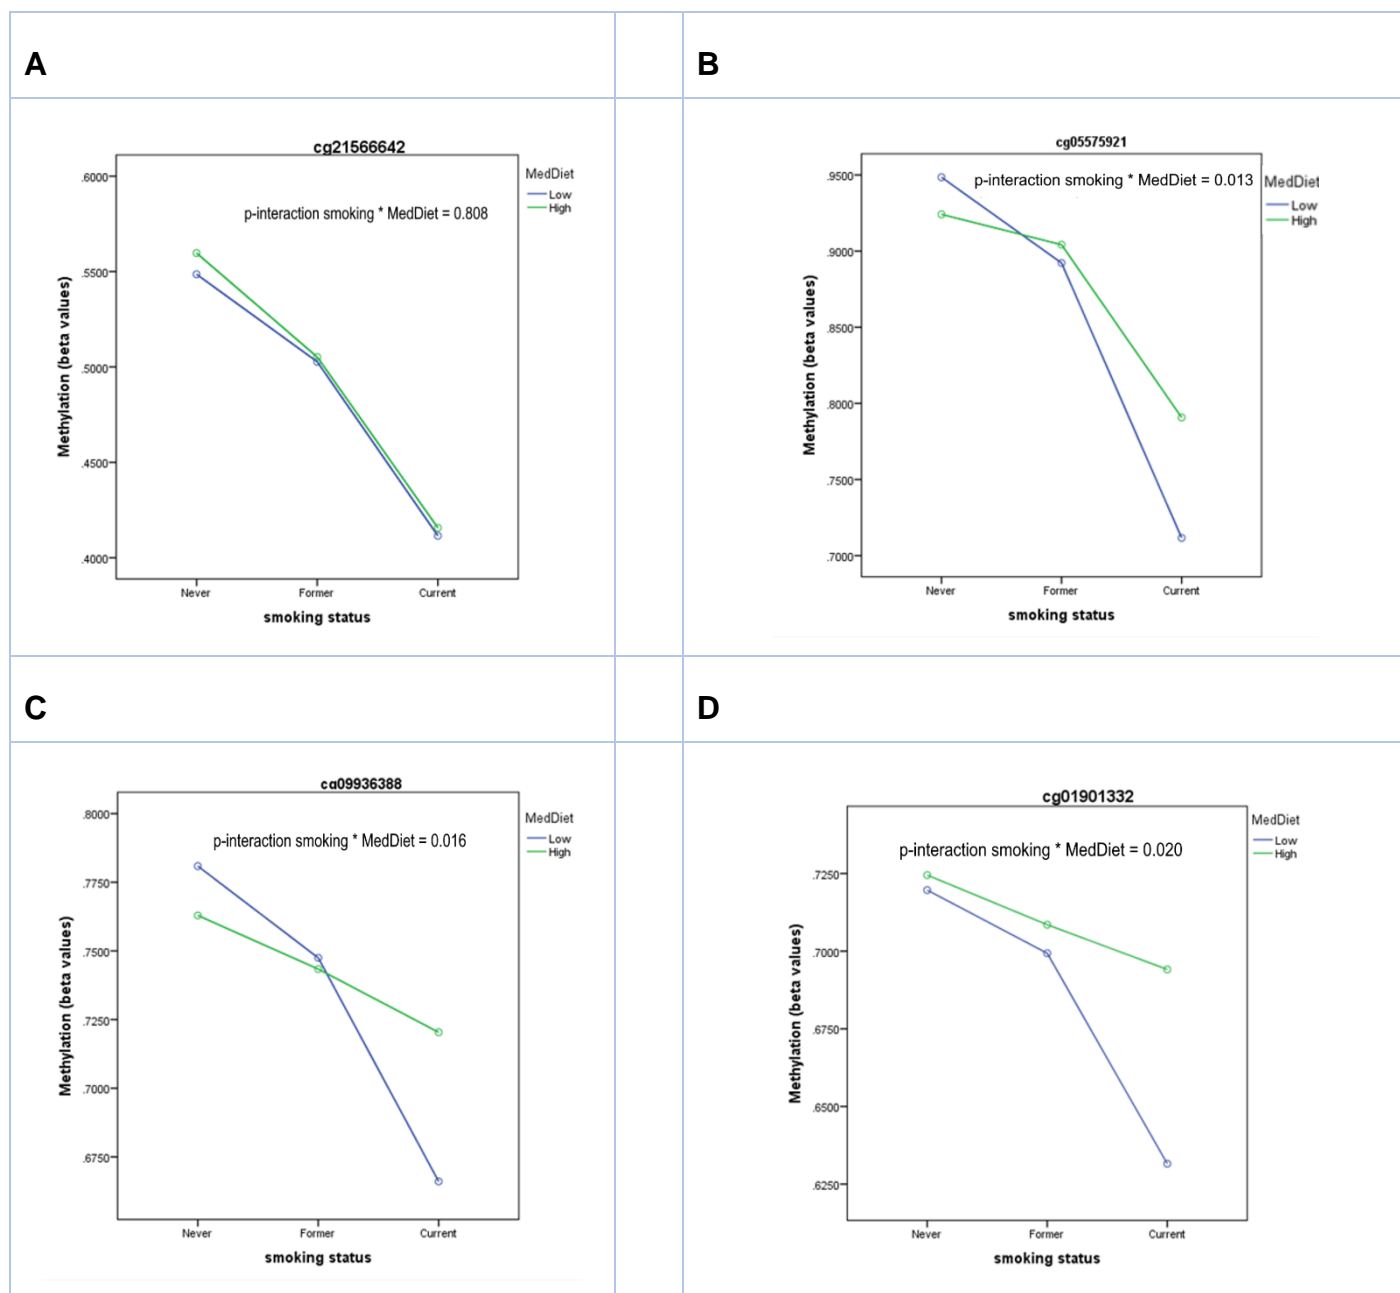

**Figure S3.** Interactions between Mediterranean diet (analyzed as low and high adherence) and smoking status in determining DNA-methylation in selected CpG sites: (A) cg21566642; (B) cg05575921; (C) cg09936388; and (D) cg01901332. P-values for the interaction terms were adjusted for sex, age, body mass index, diabetes, batch effect and leukocytes.
